# Supplementary material
Source: Springer Nature journal article supplement (https://www.springermedizin.de/resource/supplementary/12879_2007_607_MOESM4_ESM.pdf/9449300)

visits in which progression to stage 2 was detected

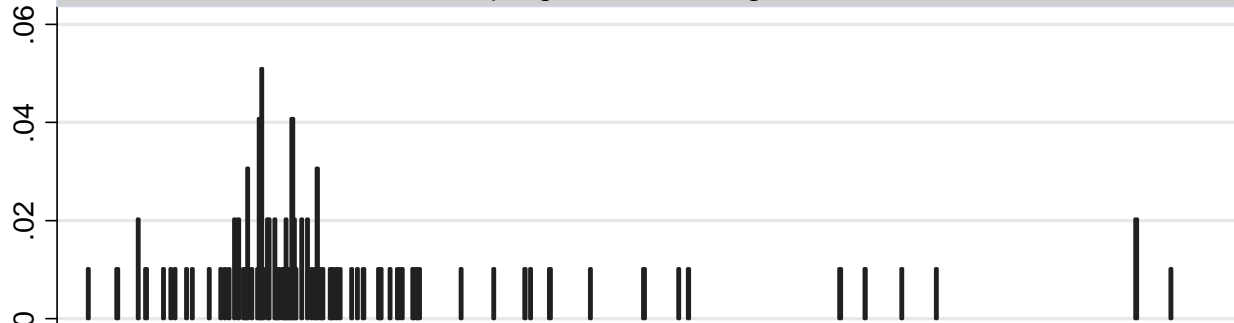

all other visits

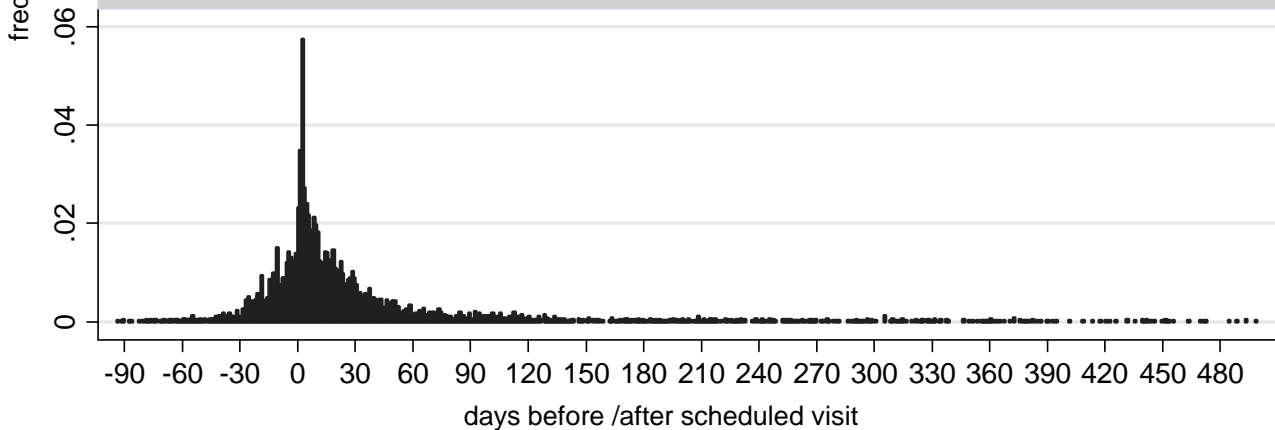

Supplement: MOESM4 [file 9449300]
